# Supplementary material
Source: PubMed Central journal article supplement (PMC4007718)
Supplement: supp_140.21.4445_DEV101170.pdf [file supp_140.21.4445_DEV101170.pdf]

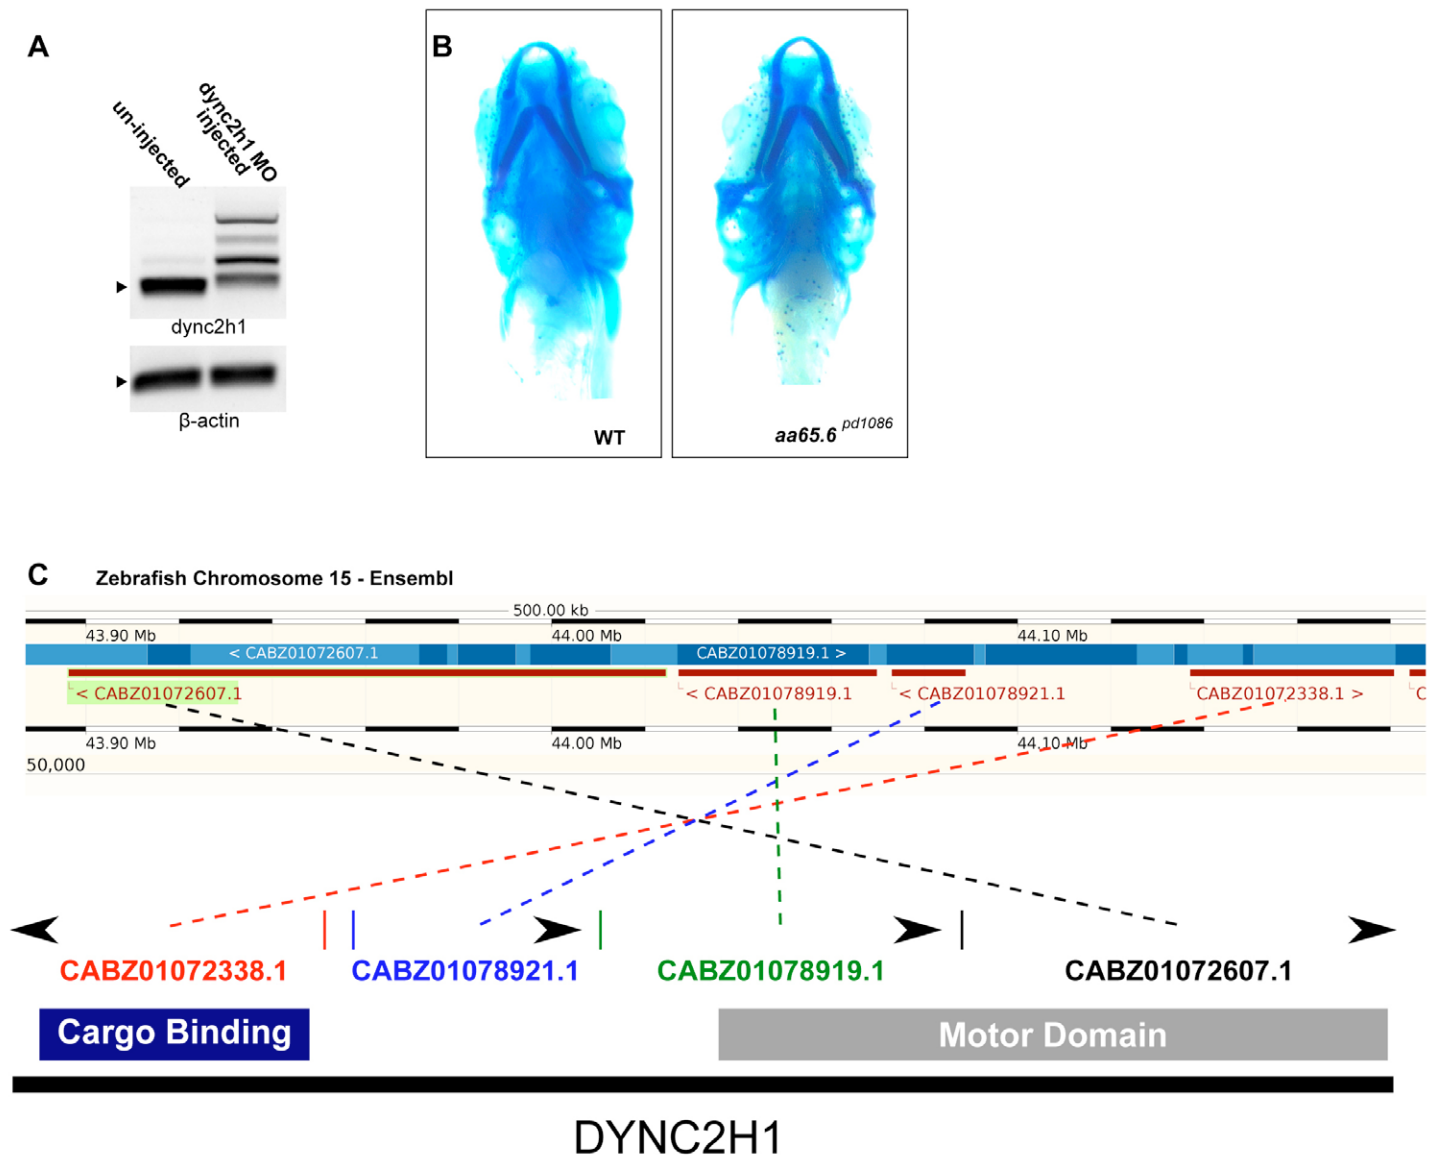

**Fig. S1. *dync2h1* morpholino validation and supplemental characterization of *aa65.6<sup>pd1086</sup>* mutant.** (A) RT-PCR from RNA of control and *dync2h1* splice-site morpholino-injected EK embryos at the one cell stage and harvested at 3 dpf. (B) Ventral view of cartilage in the jaw of 5 dpf alcian-blue stained larvae. (C) View of chromosome 15 in Ensembl showing the four transcripts that constitute the full length *dync2h1* in zebrafish and the corresponding protein domains.

**Table S1. Whole exome capture and Illumina HiSeq 2x100 bp sequencing coverage statistics for each WT/MUT pool**

| <b>Sample</b> | <b>Total paired-end reads</b> | <b>% Reads mapped to genome</b> | <b>% Bases covering Ensgene</b> | <b>Mean base quality</b> | <b>% TARGET BASES_20X</b> | <b>Mean target coverage</b> |
|---------------|-------------------------------|---------------------------------|---------------------------------|--------------------------|---------------------------|-----------------------------|
| A-test WT     | 226.4M                        | 82                              | 69                              | 37                       | 92                        | 230                         |
| A-test Mut    | 190M                          | 82                              | 72                              | 36                       | 92                        | 194                         |
| dx36.18 WT    | 103.5M                        | 86                              | 83                              | 36                       | 94                        | 151                         |
| dx36.18 Mut   | 111M                          | 86                              | 84                              | 36                       | 94                        | 166                         |
| aa65.6 WT     | 31.5M                         | 86                              | 82                              | 36                       | 80                        | 45                          |
| aa65.6 Mut    | 40.5M                         | 87                              | 85                              | 37                       | 87                        | 64                          |
| ccn1.9 WT     | 72M                           | 86                              | 82                              | 36                       | 93                        | 102                         |
| ccn1.9 Mut    | 72M                           | 87                              | 85                              | 37                       | 93                        | 113                         |
| dx33.9 WT     | 125.5M                        | 84                              | 78                              | 37                       | 97                        | 148                         |
| dx33.9 Mut    | 90.5M                         | 84                              | 78                              | 37                       | 94                        | 108                         |

**Table S2. Total individuals per WT/MUT pool, linkage interval size in bp and number of SNPs in linkage interval within coding regions**

| Panel     | Individuals in pool | Interval | Total SNPs coding/exon |
|-----------|---------------------|----------|------------------------|
| A-known*  | 10                  | 8mb      | 270                    |
| 36.18**   | 30                  | 21mb     | 105                    |
| 65.6**    | 30                  | 8.6mb    | 24                     |
| N1.9**    | 30                  | 27mb     | 144                    |
| DX33.9*** | 40                  | 17mb     | 243                    |

Filtered against SNP database, Homo Mut/Het WT only, no reference reads Mut.

\*Agilent-SureSelect-Zv9-V1 – 96.7 Mb target region.

\*\*Agilent-SureSelect-Zv9-V2 – 70.6 Mb target region.

\*\*\*Agilent-SureSelect-Zv9-V1+V2 combined.

**Table S3. SNPTrack gene candidate lists for *ccn1.9*<sup>pd1085</sup>, *dx33.9*<sup>pd1087</sup>, *dx36.18*<sup>pd1084</sup> and *aa65.6*<sup>pd1086</sup>**

**A. *ccn1.9*<sup>pd1085</sup> SNPTrack Gene Candidate List**

| Chr | Position | Ref | Chg | Consequence           | Gene              | Mutant (WT/MUT) | Wild-Type (WT/MUT) | CDS position | Protein position | Amino acids | Codons  |
|-----|----------|-----|-----|-----------------------|-------------------|-----------------|--------------------|--------------|------------------|-------------|---------|
| 20  | 37439032 | A   | C   | NON_SYNONYMOUS_CODING | <i>gpr126</i>     | 0/42            | 19/15              | 985          | 329              | T/P         | Acc/Ccc |
| 20  | 37464317 | C   | T   | NON_SYNONYMOUS_CODING | <i>gpr126</i>     | 1/127           | 72/41              | 1942         | 648              | P/S         | Cct/Tct |
| 20  | 37953087 | T   | G   | NON_SYNONYMOUS_CODING | <i>angel2</i>     | 0/161           | 87/50              | 514          | 172              | K/Q         | Aag/Cag |
| 20  | 38128844 | C   | T   | NON_SYNONYMOUS_CODING | <i>galnt14</i>    | 1/101           | 86/34              | 1361         | 454              | T/I         | aCc/aTc |
| 20  | 38470717 | C   | T   | NON_SYNONYMOUS_CODING | <i>itpkb</i>      | 1/76            | 65/32              | 884          | 295              | G/D         | gGt/gAt |
| 20  | 38593652 | T   | C   | NON_SYNONYMOUS_CODING | <i>gtf3c2</i>     | 1/73            | 62/19              | 1412         | 471              | L/P         | cTg/cCg |
| 20  | 38856354 | T   | A   | NON_SYNONYMOUS_CODING | <i>SDR16C5</i>    | 1/21            | 19/9               | 1013         | 338              | N/I         | aAc/aTc |
| 20  | 38856369 | C   | T   | NON_SYNONYMOUS_CODING | <i>SDR16C5</i>    | 1/19            | 20/8               | 998          | 333              | S/N         | aGc/aAc |
| 20  | 38870195 | G   | A   | ESSENTIAL_SPLICE_SITE | <i>ift172</i>     | 0/60            | 28/20              |              |                  |             |         |
| 20  | 39266724 | C   | T   | NON_SYNONYMOUS_CODING | <i>reps1</i>      | 1/129           | 95/31              | 1144         | 382              | P/S         | Cct/Tct |
| 20  | 40507779 | G   | C   | NON_SYNONYMOUS_CODING | <i>hsf2</i>       | 1/115           | 57/30              | 1456         | 486              | P/A         | Ccg/Gcg |
| 20  | 40836434 | C   | T   | NON_SYNONYMOUS_CODING | <i>chr6orf170</i> | 1/70            | 40/21              | 2696         | 899              | S/L         | tCa/tTa |
| 20  | 46590684 | C   | T   | STOP_GAINED           | <i>flvcr2b</i>    | 2/53            | 39/20              | 1345         | 449              | Q/*         | Cag/Tag |

**B. *dx33.9*<sup>pd1087</sup> SNPTrack Gene Candidate List**

| Chr | Position | Ref | Chg | Consequence           | Gene          | Mutant (WT/MUT) | Wild-Type (WT/MUT) | CDS position | Protein position | Amino acids | Codons  |
|-----|----------|-----|-----|-----------------------|---------------|-----------------|--------------------|--------------|------------------|-------------|---------|
| 2   | 42058893 | A   | G   | NON_SYNONYMOUS_CODING | <i>HELZ2</i>  | 0/45            | 58/30              | 6586         | 2196             | S/P         | Tct/Cct |
| 2   | 43220781 | A   | C   | STOP_GAINED           | <i>lrrc6</i>  | 0/158           | 137/68             | 530          | 177              | L/*         | tTa/tGa |
| 2   | 43960797 | C   | A   | NON_SYNONYMOUS_CODING | <i>gpb3</i>   | 0/55            | 58/33              | 784          | 262              | H/N         | Cac/Aac |
| 2   | 44712703 | C   | T   | NON_SYNONYMOUS_CODING | <i>YEATS2</i> | 0/75            | 74/43              | 1979         | 660              | T/I         | aCa/aTa |
| 2   | 44899087 | G   | A   | ESSENTIAL_SPLICE_SITE | <i>ECE2</i>   | 1/111           | 157/54             |              |                  |             |         |
| 2   | 45039439 | G   | A   | NON_SYNONYMOUS_CODING | <i>alg3</i>   | 0/79            | 83/34              | 758          | 253              | S/N         | aGc/aAc |
| 2   | 45204510 | C   | T   | NON_SYNONYMOUS_CODING | <i>capn10</i> | 0/151           | 152/66             | 1516         | 506              | G/S         | Ggt/Agt |
| 2   | 45210040 | G   | A   | NON_SYNONYMOUS_CODING | <i>capn10</i> | 0/124           | 92/50              | 746          | 249              | T/I         | aCc/aTc |
| 2   | 46421628 | A   | T   | NON_SYNONYMOUS_CODING | <i>GPC6</i>   | 0/53            | 42/19              | 356          | 119              | Q/L         | cAg/cTg |

**C. *dx36.18*<sup>pd1084</sup> SNPTrack Gene Candidate List**

| Chr | Position | Ref | Chg | Consequence           | Gene         | Mutant (WT/MUT) | Wild-type (WT/MUT) | CDS position | Protein position | Amino acids | Codons  |
|-----|----------|-----|-----|-----------------------|--------------|-----------------|--------------------|--------------|------------------|-------------|---------|
| 14  | 22092159 | G   | A   | NON_SYNONYMOUS_CODING | <i>RNF20</i> | 0/112           | 62/29              | 361          | 121              | R/C         | Cgc/Tgc |
| 14  | 24991172 | C   | A   | SPLICE_SITE&INTRONIC  | <i>kif3a</i> | 1/153           | 90/37              |              |                  |             |         |

**D. *aa65.6*<sup>pd1086</sup> SNPTrack Gene Candidate List**

| Chr | Position | Ref | Chg | Consequence           | Gene           | Mutant (WT/MUT) | Wild-type (WT/MUT) | CDS position | Protein position | Amino acids | Codons  |
|-----|----------|-----|-----|-----------------------|----------------|-----------------|--------------------|--------------|------------------|-------------|---------|
| 15  | 42636786 | G   | A   | NON_SYNONYMOUS_CODING | <i>NUMA1</i>   | 1/38            | 21/10              | 1301         | 434              | R/Q         | cGa/cAa |
| 15  | 42636902 | G   | A   | NON_SYNONYMOUS_CODING | <i>NUMA1</i>   | 2/33            | 20/9               | 1417         | 473              | E/K         | Gag/Aag |
| 15  | 42782537 | G   | C   | NON_SYNONYMOUS_CODING | <i>NUMA1</i>   | 2/37            | 35/19              | 685          | 229              | P/A         | Ccg/Gcg |
| 15  | 43896563 | A   | T   | STOP_GAINED           | <i>dync2h1</i> | 1/30            | 22/10              | 4878         | 1626             | C/*         | tgT/tgA |
